# Supplementary material for: CONUT Score: A New Tool for Predicting Prognosis in Patients with Advanced Thyroid Cancer Treated with TKI
Source: MDPI journal article supplement (doi:10.3390/cancers14030724), 2022-01-30
Supplement: s1 [file s1]

**Supplementary Table S1.** CONUT score cut-offs according to ROC analysis for Progression Free Survival (a) and Overall Survival (b).

| <b>(a) Progression Free Survival</b> |              |                    |                   |
|--------------------------------------|--------------|--------------------|-------------------|
| <i>CONUT score cut-off</i>           | <i>HR</i>    | <i>95% CI</i>      | <i>p value</i>    |
| 1                                    | 3.499        | 1.042-11.74        | 0.046             |
| 2                                    | 3.895        | 1.707-8.888        | 0.001             |
| <b>3</b>                             | <b>12.21</b> | <b>4.084-36.51</b> | <b>&lt;0.0001</b> |
| 4                                    | 4.322        | 1.612-11.58        | 0.004             |
| 5                                    | 4.304        | 1.483-12.49        | 0.007             |
| 6                                    | 4.318        | 0.9697-19.23       | 0.054             |
| <b>(b) Overall Survival</b>          |              |                    |                   |
| <i>CONUT score cut-off</i>           | <i>HR</i>    | <i>95% CI</i>      | <i>p value</i>    |
| 1                                    | 9.68         | 1.287-72.83        | 0.027             |
| 2                                    | 9.584        | 2.757-33.32        | <0.0001           |
| <b>3</b>                             | <b>23.55</b> | <b>4.949-112.1</b> | <b>&lt;0.0001</b> |
| 4                                    | 11.85        | 3.372-41.63        | 0.001             |
| 5                                    | 5.966        | 1.835-19.4         | 0.003             |
| 6                                    | 3.993        | 0.8692-18.34       | 0.075             |

**Supplementary Table S2.** Clinical-pathological features in thyroid cancer patients with CONUT score <3 (Group 1) and ≥3 (Group 2).

|                                                                              | All Patients<br>(n=42) | Group 1<br>CONUT < 3<br>(n=28) | Group 2<br>CONUT ≥ 3<br>(n=14) | <i>p</i><br>value |
|------------------------------------------------------------------------------|------------------------|--------------------------------|--------------------------------|-------------------|
| Gender n (%)                                                                 |                        |                                |                                |                   |
| F                                                                            | 23 (54.8%)             | 17 (60.7%)                     | 6 (42.8%)                      | 0.27              |
| M                                                                            | 19 (45.2%)             | 11 (39.3%)                     | 8 (57.2%)                      |                   |
| Age at the time of TKI<br>treatment (yrs)                                    |                        |                                |                                |                   |
| Median (range)                                                               | 69 (30-99)             | 71 (30-96)                     | 66 (54-86)                     | 0.78              |
| Time-lapse between<br>cancer diagnosis and<br>TKI treatment (yrs)            |                        |                                |                                |                   |
| Median (range)                                                               | 5.4 (0.06-15.4)        | 5.9 (0.06-15.4)                | 3.2 (0.09-13.9)                | 0.17              |
| Time-lapse between<br>appearance of<br>metastases and TKI<br>treatment (yrs) |                        |                                |                                |                   |
| Median (range)                                                               | 2.8 (0-14.2)           | 3.2 (0.05-12.1)                | 2.3 (0-14.2)                   | 0.37              |
| Histology n (%)                                                              |                        |                                |                                |                   |
| DTC                                                                          | 28 (66.7%)             | 19 (67.8%)                     | 9 (64.3%)                      | 0.63              |
| MTC                                                                          | 5 (11.9%)              | 4 (14.3%)                      | 1 (7.1%)                       |                   |
| PDTC                                                                         | 9 (21.4%)              | 5 (17.9%)                      | 4 (28.6%)                      |                   |
| Numbers of anatomical<br>site involved n (%)                                 |                        |                                |                                |                   |
| 1                                                                            | 5 (11.9%)              | 4 (14.3%)                      | 1 (7.1%)                       | 0.92              |
| 2                                                                            | 10 (23.8%)             | 7 (25%)                        | 3 (21.4%)                      |                   |
| ≥3                                                                           | 27 (64.3%)             | 17 (60.7%)                     | 18 (71.4%)                     |                   |
| Patients with bone<br>metastasis n (%)                                       | 15 (35.7%)             | 11 (39.3%)                     | 4 (28.6%)                      | 0.49              |
| Type of first-line TKI n<br>(%)                                              |                        |                                |                                |                   |
| Lenvatinib                                                                   | 16 (38.1%)             | 11 (39.3%)                     | 5 (35.7%)                      | 0.88              |
|                                                                              | 18 (42.8%)             | 12 (42.8%)                     | 6 (42.8%)                      |                   |

|                            |                |                  |                  |      |
|----------------------------|----------------|------------------|------------------|------|
| Sorafenib                  | 4 (9.5%)       | 3 (10.5%)        | 1 (7.1%)         |      |
| Vandetanib                 | 4 (9.5%)       | 2 (5.3%)         | 2 (14.3%)        |      |
| Motesanib                  |                |                  |                  |      |
| BMI (kg/m <sup>2</sup> )   |                |                  |                  | 0.26 |
| Median (range)             | 26.5 (18.1-47) | 27.5 (18.7-46.9) | 25.0 (18.1-31.1) |      |
| ECOG PS n (%) <sup>1</sup> |                |                  |                  | 0.32 |
| 0                          | 31 (86.1%)     | 23 (92%)         | 8 (72.7%)        |      |
| 1                          | 3 (8.3%)       | 2 (8%)           | 1 (9.1%)         |      |
| 2                          | 2 (5.6%)       | 0 (0%)           | 2 (18.2)         |      |

<sup>1</sup> ECOGS PS was evaluated in 36 patients.
